# Supplementary material for: Characterization of virulence and antimicrobial resistance genes of Aeromonas media strain SD/21–15 from marine sediments in comparison with other Aeromonas spp
Source: Front Microbiol. 2022 Dec 1;13:1022639. doi: 10.3389/fmicb.2022.1022639 (PMC9752117; doi:10.3389/fmicb.2022.1022639)
Supplement: Supplementary file 1 [file Table_1.XLS]

## Sheet: VFDB_Aeromonas
Aeromonas
VFclass	Virulence factors	Related genes	A.hydrophila ML09-119	A.hydrophila subsp. hydrophila ATCC 7966	A.salmonicida subsp. salmonicida A449		A.veronii B565	A. media 611 (This study)
			chromosome (NC_021290)	chromosome (NC_008570)	chromosome (NC_009348)	5 (NC_009350)	chromosome (NC_015424)
Adherence	Flp type IV pili	flp1	AHML_08075	AHA_1450	ASA_2915	-	B565_2735	-
		flpA	AHML_08080	AHA_1451	ASA_2914	-	B565_2734	-
		flpB	AHML_08085	AHA_1452	ASA_2913*	-	B565_2733	-
		flpC	AHML_08090	AHA_1453	ASA_2912	-	B565_2732
		flpD	AHML_08095	AHA_1454	ASA_2911	-	B565_2731	-
		flpE	AHML_08100	AHA_1455	ASA_2910	-	B565_2730	-
		flpF	AHML_08105	AHA_1456	ASA_2909	-	B565_2729	-
		flpG	AHML_08110	AHA_1457	ASA_2908*	-	B565_2728	-
		flpH	AHML_08115	AHA_1458	ASA_2907	-	B565_2727	-
		flpI	AHML_08120	AHA_1459	ASA_2906*	-	B565_2726	-
		flpJ	AHML_08125	AHA_1460	ASA_2905	-	B565_2725	-
		flpK	AHML_08130	AHA_1461	ASA_2904	-	B565_2724	-
		flpL	AHML_08135	AHA_1462	ASA_2903	-	B565_2723	-
	Lateral flagella	flgC	-	-	ASA_0364	-	-	-
		flgE	-	-	ASA_0366	-	-	-
		flgI	-	-	ASA_0370	-	-	-
		flgJ	-	-	ASA_0371	-	-	-
		fliF	-	-	ASA_0355	-	-	-
		fliG	-	-	ASA_0356	-	-	-
		fliP	-	-	ASA_0348	-	-	-
		lafB	-	-	ASA_0379	-	-	-
		lafC	-	-	ASA_0380	-	-	-
		lafE	-	-	ASA_0382	-	-	-
		lafF	-	-	ASA_0383	-	-	-
		lafK	-	-	ASA_0353	-	-	-
		lafS	-	-	ASA_0384	-	-	-
		lafT	-	-	ASA_0385	-	-	-
		lafU	-	-	ASA_0386	-	-	-
		lafX	-	-	ASA_0381	-	-	-
		lfgA	-	-	ASA_0362	-	-	-
		lfgB	-	-	ASA_0363	-	-	-
		lfgF	-	-	ASA_0367	-	-	-
		lfgG	-	-	ASA_0368	-	-	-
		lfgH	-	-	ASA_0369	-	-	-
		lfgK	-	-	ASA_0372	-	-	-
		lfgL	-	-	ASA_0373	-	-	-
		lfgM	-	-	ASA_0361	-	-	-
		lfgN	-	-	ASA_0360	-	-	-
		lfhA	-	-	ASA_0352	-	-	-
		lfhB	-	-	ASA_0351	-	-	-
		lfiE	-	-	ASA_0354	-	-	-
		lfiH	-	-	ASA_0357	-	-	-
		lfiI	-	-	ASA_0358	-	-	-
		lfiJ	-	-	ASA_0359	-	-	-
		lfiM	-	-	ASA_0346	-	-	-
		lfiN	-	-	ASA_0347	-	-	-
		lfiQ	-	-	ASA_0349	-	-	-
		lfiR	-	-	ASA_0350	-	-	-
		maf-5	-	-	ASA_0374	-	-	-
	Mannose-sensitive hemagglutinin (Msh) pilus	mshA	AHML_01955	-	-	-	B565_3659	-
		mshB	AHML_01950	AHA_0395	-	-	B565_3660	LZT28_10320
		mshC	AHML_01960	AHA_0396	-	-	B565_3658	LZT28_10330
		mshD	AHML_01965	AHA_0397	ASA_3941	-	B565_3657	LZT28_10335
		mshE	AHML_01935	AHA_0392	-	-	B565_3663	LZT28_10305
		mshF	AHML_01945	AHA_0394	-	-	B565_3661	LZT28_10315
		mshG	AHML_01940	AHA_0393	-	-	B565_3662	LZT28_10310
		mshI1	AHML_01905	AHA_0387	ASA_3946	-	B565_3669	LZT28_10275
		mshI	AHML_01900	AHA_0385	ASA_3947	-	B565_3670	LZT28_10270
		mshJ	AHML_01910	AHA_0388	ASA_3945	-	B565_3668	LZT28_10280
		mshK	AHML_01915	-	ASA_3944	-	B565_3667	LZT28_10285
		mshL	AHML_01920	AHA_0389	ASA_3943	-	B565_3666	LZT28_10290
		mshM	AHML_01925	AHA_0390	ASA_3942	-	B565_3665	LZT28_10295
		mshN	AHML_01930	AHA_0391	-	-	B565_3664	LZT28_10300
		mshO	AHML_01970	AHA_0398	ASA_3940	-	B565_3656	LZT28_10340
		mshP	AHML_01975	-	ASA_3939	-	B565_3655	LZT28_10345
		mshQ	AHML_01980	AHA_0399	ASA_3938	-	B565_3654	LZT28_10350
	Polar flagella	Undetermined	AHML_07520	AHA_1389	ASA_1361	-	B565_1123	LZT28_13925
		Undetermined	-	AHA_4177	ASA_0151	-	-	LZT28_13920
		cheA-2	AHML_07500	AHA_1385	ASA_1357	-	B565_1119	LZT28_20265
		cheB-2	AHML_07505	AHA_1386	ASA_1358	-	B565_1120	LZT28_20260
		cheR-3	AHML_15310	AHA_2843	ASA_1488	-	B565_2607	LZT28_13900
		cheV	AHML_15315	AHA_2844	ASA_1487	-	B565_2608	LZT28_13935
		cheW	AHML_07525	AHA_1390	ASA_1362	-	B565_1124	LZT28_13930
		cheY	AHML_07490	AHA_1383	ASA_1355	-	B565_1117	LZT28_17900
		cheZ	AHML_07495	AHA_1384	ASA_1356	-	B565_1118	LZT28_17905
		flaA	AHML_09350	AHA_1698	ASA_2662	-	B565_1452	LZT28_17910
		flaB	AHML_09365	AHA_1699	ASA_2661	-	B565_1454; B565_1453	LZT28_17915
		flaG	AHML_09370	AHA_1700	ASA_2660	-	-	LZT28_17920
		flaH	AHML_09375	AHA_1701	ASA_2659	-	B565_1455	LZT28_20255
		flaJ	AHML_09380	AHA_1702	ASA_2658	-	B565_1456	LZT28_20270
		flgA	AHML_15320	AHA_2845	ASA_1486	-	B565_2609	LZT28_20275
		flgB	AHML_15305	AHA_2842	ASA_1489	-	B565_2606	LZT28_20280
		flgC	AHML_15300	AHA_2841	ASA_1490	-	B565_2605	LZT28_20285
		flgD	AHML_15295	AHA_2840	ASA_1491	-	B565_2604	LZT28_20290
		flgE	AHML_15290	AHA_2839	ASA_1492	-	B565_2603	LZT28_20295
		flgF	AHML_15285	AHA_2838	ASA_1493	-	B565_2602	LZT28_20300
		flgG	AHML_15280	AHA_2837	ASA_1494	-	B565_2601	LZT28_20305
		flgH	AHML_15275	AHA_2836	ASA_1495	-	B565_2600	LZT28_20310
		flgI	AHML_15270	AHA_2835	ASA_1496	-	B565_2599	LZT28_20315
		flgJ	AHML_15265	AHA_2834	ASA_1497	-	B565_2598	LZT28_20320
		flgK	AHML_15260	AHA_2833	ASA_1498	-	B565_2597	LZT28_20250
		flgL	AHML_15255	AHA_2832	ASA_1499*	-	B565_2596	LZT28_20245
		flgM	AHML_15325	AHA_2846	ASA_1485	-	B565_2610	LZT28_13955
		flgN	AHML_15330	AHA_2847	ASA_1484	-	B565_2611	LZT28_13960
		flhA	AHML_07470	AHA_1379	ASA_1351	-	B565_1113	LZT28_13950
		flhB	AHML_07465	AHA_1378	ASA_1350	-	B565_1112	LZT28_13945
		flhF	AHML_07475	AHA_1380	ASA_1352	-	B565_1114	LZT28_13940
		flhG	AHML_07480	AHA_1381	ASA_1353	-	B565_1115	LZT28_14035
		fliA	AHML_07485	AHA_1382	ASA_1354	-	B565_1116	LZT28_14030
		fliE	AHML_07395	AHA_1364	ASA_1336	-	B565_1098	LZT28_14025
		fliF	AHML_07400	AHA_1365	ASA_1337	-	B565_1099	LZT28_14020
		fliG	AHML_07405	AHA_1366	ASA_1338	-	B565_1100	LZT28_14015
		fliH	AHML_07410	AHA_1367	ASA_1339	-	B565_1101	LZT28_14010
		fliI	AHML_07415	AHA_1368	ASA_1340	-	B565_1102	LZT28_14005
		fliJ	AHML_07420	AHA_1369	ASA_1341	-	B565_1103	LZT28_14000
		fliK	AHML_07425	AHA_1370	ASA_1342	-	B565_1104	LZT28_13995
		fliL	AHML_07430	AHA_1371	ASA_1343	-	B565_1105	LZT28_13990
		fliM	AHML_07435	AHA_1372	ASA_1344	-	B565_1106	LZT28_13985
		fliN	AHML_07440	AHA_1373	ASA_1345	-	B565_1107	LZT28_13980
		fliO	AHML_07445	AHA_1374	ASA_1346	-	B565_1108	LZT28_13975
		fliP	AHML_07450	AHA_1375	ASA_1347	-	B565_1109	LZT28_13970
		fliQ	AHML_07455	AHA_1376	ASA_1348	-	B565_1110	LZT28_17975
		fliR	AHML_07460	AHA_1377	ASA_1349	-	B565_1111	LZT28_20120
		flmD	AHML_09415	AHA_4179	ASA_0149	-	-	LZT28_05985
		flmH	AHML_11680	AHA_4175	ASA_0153	-	-	LZT28_05990
		flrA	AHML_15225	AHA_2826	ASA_1505*	-	B565_2590	LZT28_05995
		flrB	AHML_15220	AHA_2825	ASA_1506	-	B565_2589	LZT28_17930
		flrC	AHML_15215	AHA_2824	ASA_1507	-	B565_2588	LZT28_17965
		maf-1	-	AHA_1703	-	-	B565_1458	LZT28_07590
		maf-2	-	AHA_4181	ASA_0147	-	-	LZT28_14175
		motX	AHML_03390	AHA_0660	ASA_0660	-	B565_3496	LZT28_17980
		motY	AHML_14015	AHA_2642	ASA_2493	-	-	LZT28_17970
		nueA	AHML_14845	AHA_4178	ASA_0150	-	-	LZT28_03320
		nueB	AHML_09410	AHA_4180	ASA_0148	-	-	LZT28_13915
		pomA2	AHML_17725	AHA_3318	ASA_0993	-	B565_3201	LZT28_03315; LZT28_09775
		pomA	AHML_07510	AHA_1387	ASA_1359	-	B565_1121	LZT28_13910
		pomB2	AHML_17720	AHA_3317	ASA_1737	-	B565_3200	LZT28_13905
		pomB	AHML_07515	AHA_1388	ASA_1360	-	B565_1122	-
	Tap type IV pili	tapA	AHML_20500	AHA_3868	ASA_0414	-	-	LZT28_03790
		tapB	AHML_20505	AHA_3869	ASA_0413	-	B565_0359	LZT28_03785
		tapC	AHML_20510	AHA_3870	ASA_0412*	-	B565_0358	LZT28_03780
		tapD	AHML_20515	AHA_3871	ASA_0411	-	B565_0357	LZT28_03775
		tapF	AHML_09695	AHA_1757	ASA_2601*	-	B565_2370	LZT28_09660
		tapM	AHML_17120	AHA_3194	ASA_1120	-	B565_0964	LZT28_02780
		tapN	AHML_17115	AHA_3193	ASA_1121	-	B565_0965	LZT28_02775
		tapO	AHML_17110	AHA_3192	ASA_1122	-	B565_0966	LZT28_02770
		tapP	AHML_17105	AHA_3191	ASA_1123	-	B565_0967	LZT28_02765
		tapQ	AHML_17100	AHA_3190	ASA_1124	-	B565_0968	LZT28_02760
		tapT	AHML_19295	AHA_3665	ASA_3632	-	B565_3513	LZT28_07440
		tapU	AHML_19300	AHA_3666	ASA_3633	-	B565_3512	LZT28_07435
		tapV	AHML_14210	AHA_2681	ASA_2532	-	B565_1560	LZT28_16430
		tapW	AHML_14530	AHA_2739	ASA_1634	-	B565_1398	LZT28_06410
		tapY1	AHML_03545	AHA_0690	ASA_0692	-	B565_3465	-
		tapY2	-	-	-	-	B565_3464	-
		tppA	AHML_03550	AHA_0691	ASA_0688	-	B565_3469	-
		tppB	AHML_03530	AHA_0687	ASA_0689	-	B565_3468	-
		tppC	-	-	ASA_0690	-	B565_3467	-
		tppD	-	-	ASA_0691	-	B565_3466	-
		tppE	AHML_03525	AHA_0686	ASA_0693	-	B565_3462	-
		tppF	AHML_19440	AHA_3693	ASA_3659	-	B565_3457	LZT28_07295
	Type I fimbriae	fimA	AHML_02665	AHA_0519	ASA_3725	-	B565_0475	-
		fimC	AHML_02675	AHA_0521	ASA_3727	-	B565_0477	-
		fimD	AHML_02680	AHA_0522	ASA_3728	-	B565_0478	-
		fimE	AHML_02685	AHA_0523	ASA_3729	-	B565_0479	-
		fimF	AHML_02690	AHA_0524	ASA_3730	-	B565_0480	-
Secretion system	T2SS	exeA	AHML_20105	AHA_3785	ASA_0515	-	B565_2887	LZT28_04295
		exeB	AHML_20110	AHA_3786	ASA_0514	-	B565_2888	LZT28_04290
		exeC	AHML_02905	AHA_0568	ASA_3774	-	B565_2889	LZT28_04355
		exeD	AHML_02910	AHA_0569	ASA_3775	-	B565_2890	LZT28_04360
		exeE	AHML_02915	AHA_0570	ASA_3776	-	B565_2891	LZT28_04365
		exeF	AHML_02920	AHA_0571	ASA_3777	-	B565_2892	LZT28_04370
		exeG	AHML_02925	AHA_0572	ASA_3778	-	B565_2893	LZT28_04375
		exeH	AHML_02935	AHA_0573	ASA_3779	-	B565_2894	LZT28_04380
		exeI	AHML_02940	AHA_0574	ASA_3780	-	B565_2895	LZT28_04385
		exeJ	AHML_02945	AHA_0575	ASA_3781	-	B565_2896	LZT28_04390
		exeK	AHML_02950	AHA_0576	ASA_3782	-	B565_2897	LZT28_04405
		exeL	AHML_02955	AHA_0577	ASA_3783	-	B565_2898	LZT28_04410
		exeM	AHML_02960	AHA_0578	ASA_3784	-	B565_2899	LZT28_04415
		exeN	AHML_02965	AHA_0579	ASA_3785	-	B565_2900	LZT28_04420
		tapD	AHML_20515	AHA_3871	ASA_0411	-	B565_0357	-
	T3SS	acr1	-	-	-	ASA_P5G074	-	-
		acr2	-	-	-	ASA_P5G073	-	-
		acrG	-	-	-	ASA_P5G068	-	-
		acrH	-	-	-	ASA_P5G066	-	-
		acrR	-	-	-	ASA_P5G069	-	-
		acrV	-	-	-	ASA_P5G067	-	-
		aexT	-	-	ASA_4266	-	-	-
		aopB	-	-	-	ASA_P5G065	-	-
		aopD	-	-	-	ASA_P5G064	-	-
		aopH	-	-	-	ASA_P5G009	-	-
		aopN	-	-	-	ASA_P5G075	-	-
		aopO	-	-	-	ASA_P5G098	-	-
		aopX	-	-	-	ASA_P5G084*	-	-
		ascB	-	-	-	ASA_P5G058	-	-
		ascC	-	-	-	ASA_P5G057	-	-
		ascD	-	-	-	ASA_P5G056	-	-
		ascE	-	-	-	ASA_P5G055	-	-
		ascF	-	-	-	ASA_P5G054	-	-
		ascG	-	-	-	ASA_P5G053	-	-
		ascH	-	-	-	ASA_P5G052	-	-
		ascI	-	-	-	ASA_P5G051	-	-
		ascJ	-	-	-	ASA_P5G050	-	-
		ascK	-	-	-	ASA_P5G049	-	-
		ascL	-	-	-	ASA_P5G048	-	-
		ascN	-	-	-	ASA_P5G076	-	-
		ascO	-	-	-	ASA_P5G077	-	-
		ascP	-	-	-	ASA_P5G078	-	-
		ascQ	-	-	-	ASA_P5G079	-	-
		ascR	-	-	-	ASA_P5G080	-	-
		ascS	-	-	-	ASA_P5G081	-	-
		ascT	-	-	-	ASA_P5G082	-	-
		ascU	-	-	-	ASA_P5G083	-	-
		ascV	-	-	-	ASA_P5G070	-	-
		ascX	-	-	-	ASA_P5G072	-	-
		ascY	-	-	-	ASA_P5G071	-	-
		ati1	-	-	-	ASA_P5G046	-	-
		ati2	-	-	-	ASA_P5G045	-	-
		exsA	-	-	-	ASA_P5G060	-	-
		exsB	-	-	-	ASA_P5G061	-	-
		exsC	-	-	-	ASA_P5G063	-	-
		exsD	-	-	-	ASA_P5G059	-	-
		exsE	-	-	-	ASA_P5G062	-	-
		sycH	-	-	-	ASA_P5G008	-	-
		sycO	-	-	-	ASA_P5G097	-	-
		sycX	-	-	-	ASA_P5G085	-	-
	T6SS	Undetermined	-	AHA_1847	ASA_2456	-	-	-
		atsA	-	AHA_1828	-	-	-	-
		atsB	-	AHA_1829	-	-	-	-
		atsC	-	AHA_1830	-	-	-	-
		atsD	-	AHA_1831	ASA_0454	-	-	-
		atsG	-	AHA_1834	ASA_2468	-	-	-
		atsH	-	AHA_1835	ASA_2467	-	-	-
		atsI	-	AHA_1836	ASA_2466	-	-	-
		atsJ	-	AHA_1837	ASA_2465	-	-	-
		atsK	-	AHA_1838	ASA_2464	-	-	-
		atsL	-	AHA_1839	ASA_2463	-	-	-
		atsP	-	AHA_1843	ASA_2459	-	-	-
		atsQ	-	AHA_1844	-	-	-	-
		atsS	-	AHA_1846	ASA_2457	-	-	-
		clpV1	-	AHA_1841	ASA_2461	-	-	-
		dotU	-	AHA_1840	ASA_2462	-	-	-
		hcp1	AHML_05970	AHA_1118	-	-	-
		hcp	AHML_10025	AHA_1826	-	-	-	LZT28_16330
		vasH	-	AHA_1842	ASA_2460	-	-	-
		vasK/atsR	-	AHA_1845	-	-	-
		vgrG1	AHML_05975	AHA_1119	-	-	-	LZT28_16340
		vgrG2	AHML_10030	AHA_1827	-	-	-	-
		vgrG3	-	AHA_1848	-	-	-	-
		vipA	-	AHA_1832	ASA_2470	-	-	-
		vipB	-	AHA_1833	-	-	-	-
Toxin	Aerolysin AerA/Cytotoxic enterotoxin Act	aerA/act	AHML_02265	AHA_0438	ASA_3906	-	B565_3626	-
	Extracellular hemolysin AHH1	ahh1	AHML_08400	AHA_1512	ASA_2854	-	-	-
	Heat-stable cytotonic enterotoxin	ast	AHML_04100	AHA_0804	-	-	-	-
	Hemolysin HlyA	hlyA	AHML_15145	AHA_2809	ASA_1523	-	B565_2574	LZT28_06075
	Hemolysin III	Undetermined	AHML_18530	AHA_3493	ASA_0824	-	B565_0799	LZT28_19150
	The repeat in toxin (RTX)	rtxA	AHML_07370	AHA_1359	-	-	-	-
		rtxB	-	AHA_1356	-	-	-	-
		rtxC	-	AHA_1358	-	-	-	-
		rtxD	-	AHA_1355	-	-	-	-
		rtxE	-	AHA_1354	-	-	-	-
		rtxH	-	AHA_1357	-	-	-	-
	Thermostable hemolysin (TH)	Undetermined	AHML_17235	AHA_3217	ASA_1096	-	B565_0938	LZT28_02905
Anaerobic respiration	Nitrate reductase(Mycobacterium)	narH						LZT28_21005
Antiphagocytosis	Capsule(Klebsiella)	wzb						LZT28_21950
Immune evasion	Capsule(Acinetobacter)							LZT28_01920
Serum resistance	LPS rfb locus(Klebsiella)							LZT28_22305; LZT28_22310
Stress adaptation	Catalase-peroxidase(Mycobacterium)	katG						LZT28_10000
	Table saved from VFDB (http://www.mgc.ac.cn/VFs/) [Wed May 4 02:19:23 2022]
